# Supplementary material for: The Bone Regeneration Capacity of BMP-2 + MMP-10 Loaded Scaffolds Depends on the Tissue Status
Source: MDPI journal article supplement (doi:10.3390/pharmaceutics13070979), 2021-06-29
Supplement: s1 [file s1]

# Supplementary Material: The Bone Regeneration Capacity of BMP-2 + MMP-10 Loaded Scaffolds Depends on the Tissue Status

Patricia Garcia-Garcia, Ricardo Reyes, José Antonio Rodríguez, Tomas Martín , Carmen Evora , Patricia Díaz-Rodríguez and Araceli Delgado

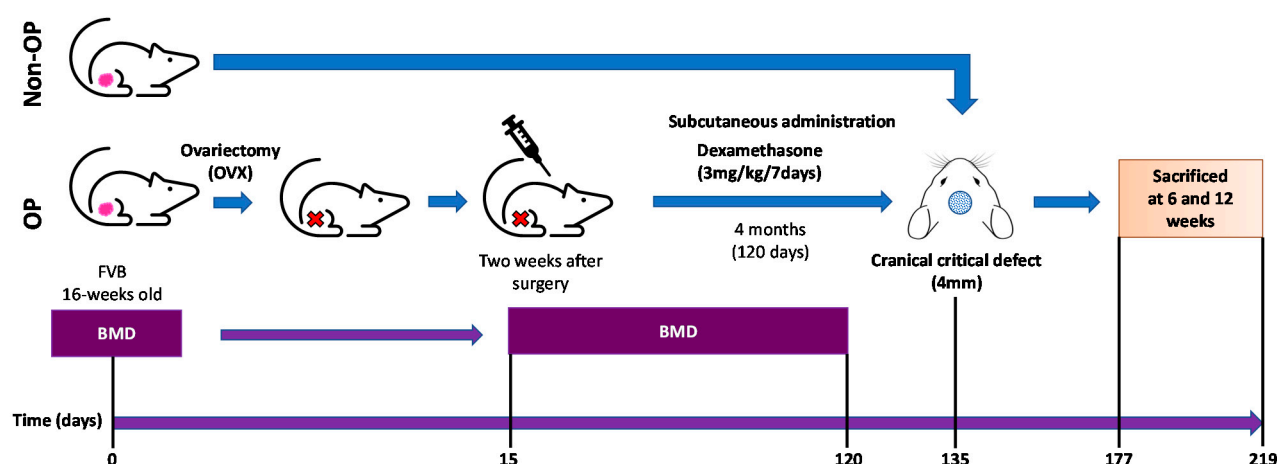

**Figure S1.** - *In vivo* experiments timeline for osteoporotic model evaluation by bone mineral density (BMD) measurements and the assessment of scaffold performance.

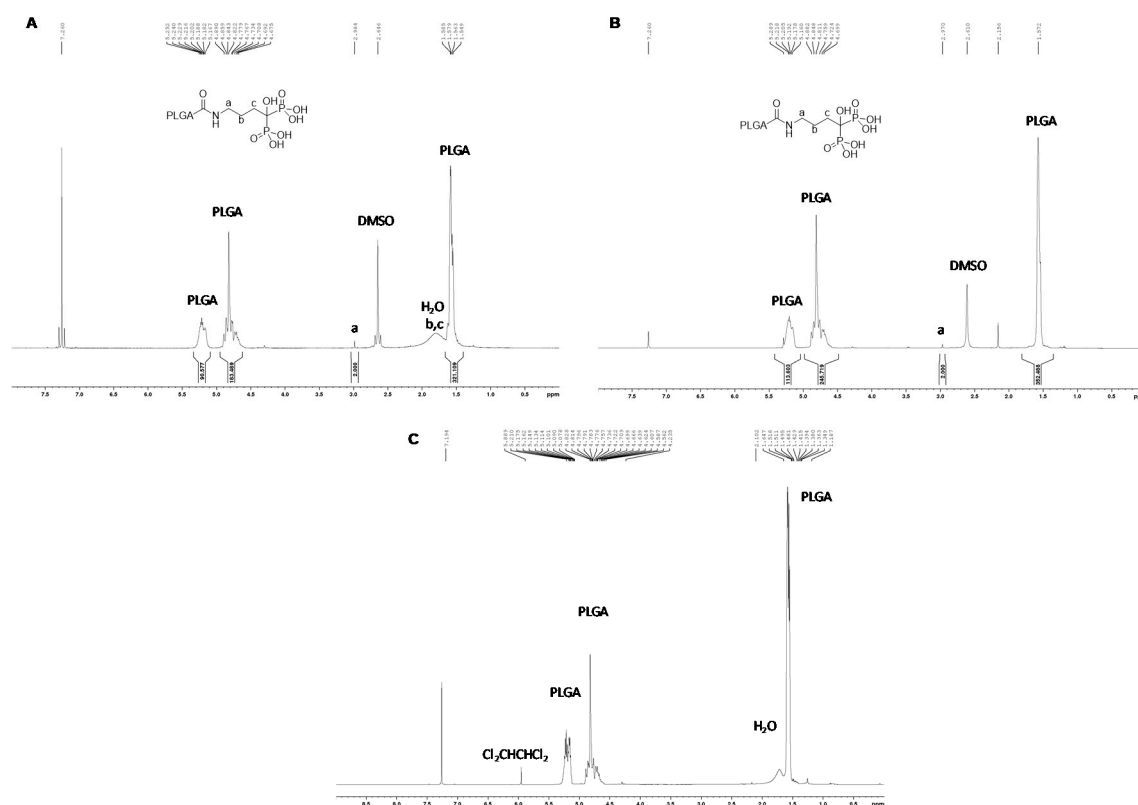

**Figure S2.** - <sup>1</sup>H-NMR spectrum of A) PLGA-ALD from Resomer® RG 502 H; B) PLGA-ALD from Resomer® RG 504 H and C) Electrospun meshes soaked 72 hours in water (Cl<sub>2</sub>CHCHCl<sub>2</sub> was used as internal standard). The signal at 7.26 ppm corresponds to the signal from the solvent CHCl<sub>3</sub>.

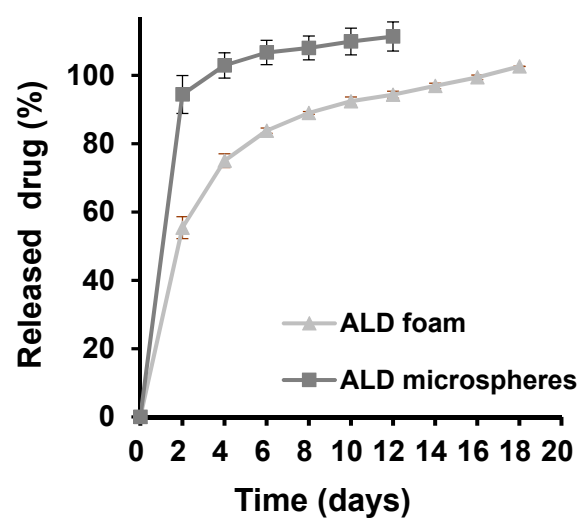

**Figure S3.** - In vitro drug release profiles of ALD from microsphere-loaded chitosan foams (ALD foam) and plain microspheres (ALD microspheres).
